# Supplementary material for: Expression and specificity of a chitin deacetylase from the nematophagous fungus Pochonia chlamydosporia potentially involved in pathogenicity
Source: PubMed Central journal article supplement (PMC5794925; doi:10.1038/s41598-018-19902-0), 2018-02-01

## Supplementary Information

### Expression and specificity of a chitin deacetylase from the nematophagous fungus *Pochonia chlamydosporia* potentially involved in pathogenicity

Almudena Aranda-Martinez<sup>1</sup>, Laia Grifoll-Romero<sup>2</sup>, Hugo Aragunde<sup>2</sup>, Enea Sancho-Vaello<sup>2</sup>, Xevi Biarnés<sup>2</sup>, Luis Vicente Lopez-Llorca<sup>1</sup>, and Antoni Planas<sup>2\*</sup>

<sup>1</sup>Laboratory of Plant Pathology, Department of Marine Sciences and Applied Biology, Multidisciplinary Institute for Environmental Studies Ramón Margalef, University of Alicante, PO box 99, 03080 Alicante, Spain. <sup>2</sup>Laboratory of Biochemistry, Institut Químic de Sarrià, Universitat Ramon Llull, Via Augusta 390, 08017, Barcelona, Spain.

#### Contents:

**Figure S1.** *Pc\_2566* nucleotide sequence and predicted protein sequence.

**Figure S2.** Augustus and GeneMark output for *pc\_2566* gene prediction.

**Figure S3.** *Pochonia chlamydosporia* (*pc\_2566*) and *Metarhizium acridum* (NW\_006916702.1) chitin deacetylase (CDA) genomic sequence alignment.

**Figure S4.** pET22b-*Pc\_2566\_CE*-StreplIC plasmid for *PcCDA* protein expression.

**Figure S5.** SDS polyacrylamide gel electrophoresis analyses of protein expression and refolding.

**Figure S6.** HPLC-MS monitoring of deacetylase activity by *PcCDA* catalytic domain on GlcNAc<sub>4</sub>.

**Figure S7.** HPLC-MS monitoring of GlcNAc<sub>3</sub> incubated with the *PcCDA* catalytic domain.

**Figure S8.** Sequence alignment of *PcCDA* from *P. chlamydosporia* (catalytic domain) and *CICDA* from *C. lindemuthianum*.

**Figure S9.** Structural models of *PcCDA* catalytic domain in complex with substrates.

**Figure S10.** Model structures of *PcCDA*. Superposition of Models 1 and 2.

**Figure S11.** Original SDS-PAGE gels used in Figure S5.

**Figure S1.** (A) *Pc\_2566* nucleotide sequence and predicted protein sequence. Signal peptide is shown in italics. Double underline shows the catalytic domain and single underline indicates the position of the CBM18 predicted modules. Circle and square boxes point putative O-glycosylation and N-linked glycosylation sites, respectively. Cysteine residues are highlighted with (~) symbols. The position of introns is indicated by arrows in the nucleotide sequence (see Fig. S2 for full genomic sequence) while (\*) symbol indicates the stop codon. (B) *PcCDA* protein domains. Modular structure of *PcCDA* protein showing both CBM18 domains flanking the CE4 catalytic domain and signal peptide in the N-terminal end, and structure of expressed protein purified by affinity chromatography containing CE4 domain and Strep Tag peptide.

**A)**

```

1  ATG GCT CTG AGA ATA TCC CTC CTA TTT GCC GTG TGT GCT CTG GCT ACC GAC GGT TCC CGT
1  M A L R I S L L F A V C A L A T D G S R

61  TTC ATT CCG GCA GCA GAG GCC AAT GAG ATG TCC ATG TGC GGT CCC GGT AAA GGA TCA TGC
21  F I R A A E A N E M S M C G P G K G S C

121 GAA ATG GGC TCA TGT TGT TCA GAG ATG GGG TAT TGC GGC ACT ACG GAA CAG TAT TGC TCA
41  E M G S C C S E M G Y C G T T E Q Y C S

181 GGC TCT CAG TGC CAG TTG GAC TAC AGC CAT ACT TGC CAC ACG CTG GTT CCC CCT CGT GGG
61  G S Q C Q L D Y S H T C H (T) L V P P R G

241 AAG GAC ACT TCA GGA ATA ACC CGT CGA CAA GTC GGA AAC GTC CCT TAT GGA CCA ATG ATT
81  K D T (S) G I T R R Q V G N V P Y G P M I

301 ACA GCT TGC AAA CAG CCT GGC ATG GTA GCC TTG ACA TTC GAC GAC GGT CCG TAC ATT TAC
101 T A C K Q P G M V A L T F D D G P Y I Y

361 ACT ACC GAA ATC CTG AAC CTG CTT GAC CGG CTC AAG GTC AAG GCT ACT TTC TTC ATC ACG
121 T T E I L N L L D R L K V K A T F F I T

421 GGT GAC AAC CGA GTC AAG GGA CAT ATT GAC GAT CCG GCG ACT CGC TGG CCA AGC ATT ATA
141 G D N R V K G H I D D P A T R W P S I I

481 CGT CGC ATG TAC GAC GCG GGA CAT CAA ATT GGG AGC CAC ACC TGG ACG CAT CGT GAT CTG
161 R R M Y D A G H Q I G S H T W T H R D L

541 AAC CAT ATC AAC GAG ACG GTG CGG CGA GCT GAA ATC ATT CAC AAT GAG ATG GCC ATA CGG
181 N H I (N) E T V R R A E I I H N E M A I R

601 AAC ATT CTT GGT TGG ATC CCC ACG TAC ATC CGG CCA CCT TTC TTG GAG TGT TCC GCC AGA
201 N I L G W I P T Y I R P P F L E C S A R

661 TCT GGG TGT GAG AAG ACC ATG AGA GAC ATG GTG TAT CAC TCC ATC TCC ACC AAC TTG GAC
221 S G C E K T M R D M V Y H S I S T N L D

721 ACC AAA GAC TAC ATG TAT GAC GAC CCA ACC CTC ATT CAA AGG GCA AAG GAC CTC TAC TCT
241 T K D Y M Y D D P T L I Q R A K D L Y S

781 AAT GGA CTG TCA ACC AAT CCA CGG CAG AAC TCA TAC ATT GTC CTT GCA CAC GAT GTT CAT
261 N G L S T N P R Q N S Y I V L A H D V H

841 GAG CAA ACC GTG TAT GAA CTG ACT CCA TAC ATG GTA AAG GTT GCT AGA GAG AGA GGC TAC
281 E Q T V Y E L T P Y M V K V A R E R G Y

901 CAG CTT GTC ACG GTA GGT GAA TGC CTA GGA GAC CCC AGA GGT AAC TGG TAT AGA TCA GCG
301 Q L V T V G E C L G D P R G N W Y R S A

961 GAA GAC TCG CCA AAA TCC ACC AGA AGC GAC AAA AAG AAA GAC TCA TGT CCC GGT CCA AAA
321 E D S P K S T R S D K K K D S C P G P K

1021 AAG CCA ATC GTC ACG GAT ATC CCG CCC CCA AGG AAT ACG ACG AGC AAG ATA TCT CCC AAC
341 K P I V (T) D I P P P R N (T) T (S) K I (S) P N

1081 CAA CGC TGC GGA GGA AGT ACA GGA TAC ATC TGT CCA GGC TCC GGG TTT GGA GAC TGC TGC
361 Q R C G G S T G Y I C P G S G F G D C C

1141 TCT CAC TAT GGA TAT TGT GGA TCA ACT CCC GAG TTC TGT GGC ACA GGG TGT GAC AAT GAC
381 S H Y G Y C G S T P E F C G T G C D N D

1201 TTT GGG GAC TGC AAC CCA AAT CCC CCA GGC ATC TGG GAC ACA ACG AAT GGC TTA TGT GGC
401 F G D C N P N P P G I W D T T N G L C G

1261 GCT CGG TTC TCT GCG ACA TGC CTT AAT TTT GCA GGA AAG GCA TGC TGC TCC AAG TAT GGA
421 A R F S A T C L N F A G K A C C S K Y G

1321 TAT TGG TAT GTA GTG CAT TCT GTG TGG TTA CTT TAT CGG TTG GAC TGA CGT GGT CGG CAG
441 Y W Y V V H S V W L L Y R L D *

```

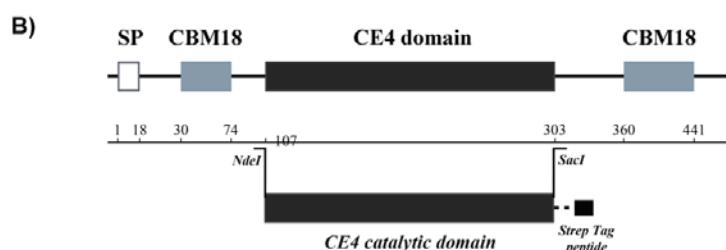

**Figure S2.** Augustus and GeneMark output for Pc\_2566 gene prediction. (A) Augustus predicts 5 introns while (B) GeneMark only 4. Two first introns are coincident in size and position.

**A. Augustus output for Pc\_2566 gene prediction**

|           |          |             |      |      |      |   |   |                                      |
|-----------|----------|-------------|------|------|------|---|---|--------------------------------------|
| unnamed-1 | AUGUSTUS | gene        | 2596 | 4297 | 0.07 | + | . | g2                                   |
| unnamed-1 | AUGUSTUS | transcript  | 2596 | 4297 | 0.07 | + | . | g2.t1                                |
| unnamed-1 | AUGUSTUS | start_codon | 2596 | 2598 | .    | + | 0 | transcript_id "g2.t1"; gene_id "g2"; |
| unnamed-1 | AUGUSTUS | initial     | 2596 | 2819 | 0.26 | + | 0 | transcript_id "g2.t1"; gene_id "g2"; |
| unnamed-1 | AUGUSTUS | internal    | 2910 | 2974 | 0.5  | + | 1 | transcript_id "g2.t1"; gene_id "g2"; |
| unnamed-1 | AUGUSTUS | internal    | 3031 | 3653 | 0.64 | + | 2 | transcript_id "g2.t1"; gene_id "g2"; |
| unnamed-1 | AUGUSTUS | internal    | 3859 | 3898 | 0.45 | + | 0 | transcript_id "g2.t1"; gene_id "g2"; |
| unnamed-1 | AUGUSTUS | internal    | 3977 | 4144 | 0.36 | + | 2 | transcript_id "g2.t1"; gene_id "g2"; |
| unnamed-1 | AUGUSTUS | terminal    | 4200 | 4297 | 0.4  | + | 2 | transcript_id "g2.t1"; gene_id "g2"; |
| unnamed-1 | AUGUSTUS | intron      | 2820 | 2909 | 0.48 | + | . | transcript_id "g2.t1"; gene_id "g2"; |
| unnamed-1 | AUGUSTUS | intron      | 2975 | 3030 | 0.46 | + | . | transcript_id "g2.t1"; gene_id "g2"; |
| unnamed-1 | AUGUSTUS | intron      | 3654 | 3858 | 0.46 | + | . | transcript_id "g2.t1"; gene_id "g2"; |
| unnamed-1 | AUGUSTUS | intron      | 3899 | 3976 | 0.53 | + | . | transcript_id "g2.t1"; gene_id "g2"; |
| unnamed-1 | AUGUSTUS | intron      | 4145 | 4199 | 0.42 | + | . | transcript_id "g2.t1"; gene_id "g2"; |
| unnamed-1 | AUGUSTUS | CDS         | 2596 | 2819 | 0.26 | + | 0 | transcript_id "g2.t1"; gene_id "g2"; |
| unnamed-1 | AUGUSTUS | CDS         | 2910 | 2974 | 0.5  | + | 1 | transcript_id "g2.t1"; gene_id "g2"; |
| unnamed-1 | AUGUSTUS | CDS         | 3031 | 3653 | 0.64 | + | 2 | transcript_id "g2.t1"; gene_id "g2"; |
| unnamed-1 | AUGUSTUS | CDS         | 3859 | 3898 | 0.45 | + | 0 | transcript_id "g2.t1"; gene_id "g2"; |
| unnamed-1 | AUGUSTUS | CDS         | 3977 | 4144 | 0.36 | + | 2 | transcript_id "g2.t1"; gene_id "g2"; |
| unnamed-1 | AUGUSTUS | CDS         | 4200 | 4294 | 0.4  | + | 2 | transcript_id "g2.t1"; gene_id "g2"; |
| unnamed-1 | AUGUSTUS | stop_codon  | 4295 | 4297 | .    | + | 0 | transcript_id "g2.t1"; gene_id "g2"; |

**B. GeneMark output for Pc\_2566 gene prediction**

| Gene # | Exon # | Strand | Exon Type | Exon Range |      | Exon Length | Start/End Frame |   |    |
|--------|--------|--------|-----------|------------|------|-------------|-----------------|---|----|
| 3      | 1      | +      | Initial   | 2596       | 2819 | 224         | 1               | 2 | -- |
| 3      | 2      | +      | Internal  | 2910       | 2974 | 65          | 3               | 1 | -- |
| 3      | 3      | +      | Internal  | 3031       | 3653 | 623         | 2               | 3 | -- |
| 3      | 4      | +      | Internal  | 3700       | 4144 | 445         | 1               | 1 | -- |
| 3      | 5      | +      | Terminal  | 4200       | 4297 | 98          | 2               | 3 | -- |

**Figure S3.** *Pochonia chlamydosporia* (Pc\_2566) and *Metarhizium acridum* (NW\_006916702.1) chitin deacetylase (CDA) genomic sequence alignment. Introns of *M. acridum* sequence are marked in yellow. First two introns (red bars) predicted by both Augustus and GeneMark are coincident. Third intron (green bars) from *P. chlamydosporia* was predicted taking into account the position of *M. acridum* third intron.

```

Pc_2566 genomic sequence      ATG GCT CTG AGA ATA TCC CT CCT ATT TGC CGT GTG TG CTCTGGCTA CCG ACG GT TCC CGT
NW_006916702.1 Ma genomic sequence      ATG ACA CCA AAA CTC GG CCT CCT CCT CGC TGT GTA CT TCC AGA GCC TGC TAG CCT TTC CGT

Pc_2566 genomic sequence      TTC AIT CGG GCA GCA GA GGC CAA TGA GAT GTC CAT GT GCG GTC CCG GTA AAG GAT CTA TGC
NW_006916702.1 Ma genomic sequence      TTC AAT CGG GAA CTA GT CGC CAA TGA AAA AGC AAT GT GCG GTC CCG GCG AGG GAT CTA GT

Pc_2566 genomic sequence      GAA ATG GGC TCA TGT TG TTC AGA GAT GGG GTA TTG CGG CACTA CCG A CAG T AT TGCT CA
NW_006916702.1 Ma genomic sequence      GAA ATG GGT TCA TGC TG CTC AGA GAT GGG GTT CTG CGG CCA CCA CAG CCG AGT AT TGT TCA

Pc_2566 genomic sequence      GGCTCTC CAG TGC CAG TT GGA CTA CAG CCA TAC TTG CCA CAC CGT GTG GAG TAG CAA CT AGC
NW_006916702.1 Ma genomic sequence      GGCTCG CAG TGT CAA CT AGA CTA CAG TCA TAC TTG CG ATA CGC TGT GAG CAT CAAA ----

Pc_2566 genomic sequence      CAA GTT GTG TGA TGT GA TCC AGA GAC CGT TGA AA TGA CAT GAC ATG C-C ATG CC GAG CTG
NW_006916702.1 Ma genomic sequence      ----- ACCAG ATT GG CAA GAC TTT CAT GTA AT TGG CTA

Pc_2566 genomic sequence      ACA AGT TGC ATC CAG AG TTC CCC CTC GTG GGA AGG A CACT TCA GGA ATA ACC CG TCG ACA
NW_006916702.1 Ma genomic sequence      ACCAATAGA GTT AAG GGTGC CTC CTG ATG GCA GTG A CACT TCA GAA ATA CCC GAC ACC G

Pc_2566 genomic sequence      AGT CGG AAA CGT CCC TT ATG GTG AGA GCC ACG AAG GA AAG GGG TCG TGA TTT TC GGA GCG
NW_006916702.1 Ma genomic sequence      GGT TGG GAA AGT CCC AT ATG G TAA TT GTT CAC AGA GT TTG CCG GAA GGG A CACT TTG GAC

Pc_2566 genomic sequence      TAA CAC ATC TCC CCA G ACC AAT GAT TAC AGC TTG CAA A CAG C CTG GCA TGG TA GCC TTG
NW_006916702.1 Ma genomic sequence      TAA C G A T T T --- C A G G GCC CAT GAT CAC ATC AT GCA ACA ATC CAG GGA TGG TG GCT CTG

Pc_2566 genomic sequence      ACA TTC GAC GAC GGT CC GTA CAT TTA CAC TAC CGA AA TCC TGA ACC TGC TTG AC GCG CTC
NW_006916702.1 Ma genomic sequence      ACG TTC GAC GAC GGC CC CTA CAT CTA CAC CAC GGA AC TTC TGG ACC TTC TCG CA GCG CAC

Pc_2566 genomic sequence      AAG GTC AAG GCT ACT TT CTT CAT CAC GGG TGA CAA CC GAG TCA AGG GAC ATA TT GAC GAT
NW_006916702.1 Ma genomic sequence      GAG GTC AAG GCC ACC TT CTT CAT CAC GGG AGA CAA CC GCG CCA AGG GAC ACAT C GAT GAC

Pc_2566 genomic sequence      CCG GCG ACT CGT TGG CC AAG CAT TAT ACG TCG CAT GT ACG ACG CCG GAC ATC AAA TT GGG
NW_006916702.1 Ma genomic sequence      CCG GCG ACG GAA TGG CC GAG TAT CCT GCG GCG CAT GT ACA ACG CCG GCC ACC AG CT GCT

Pc_2566 genomic sequence      AGC CAC ACC TGG ACG CA TCG TGA TCT GAA CCA TAT CA ACG AGA CCG TGC GGC GA GCT GAA
NW_006916702.1 Ma genomic sequence      AGT CAC ACG TGG ACA CA TCG CGA CTT GAC TCA GGT CA ACG AGA CCG TGC GGC GG GCA GAG

Pc_2566 genomic sequence      ATC AIT CAC AAT GAG AT GGC CAT ACG GAA CAT TCT TG GTT GGA TCC CCA CGT AC ATC CGG
NW_006916702.1 Ma genomic sequence      AIT AIT CAC AAC GAA AT GGC CCT TCG CAA TAT CCT TG GCC GGA TCC CCA CGT AC ATC CGG

Pc_2566 genomic sequence      CCA CCT TTC TTG GAG TG TTC CGC CAG ATC TGG GTG TG AGA AGA CCA TGA GAG AC ATG GTG
NW_006916702.1 Ma genomic sequence      CCCCCA TTC TG GAA TG TTC TAC CGG TTC CGG GTG TG AAG AAA CCT TGG GTG ACT TTG GCA

Pc_2566 genomic sequence      TAT CACTCC ATC TCC AC CAA CTT GGA CAC CAA AG ACT ACA TGT ATG ACG ACC CA ACC CTC
NW_006916702.1 Ma genomic sequence      TAC CAC TCC ATC TCG GC CAA CTT GGA CAC CAA AGA CT ACA TGT ACG ATG ACC CG GCC CTC

Pc_2566 genomic sequence      ATT CAA AGG GCA AAG GAC CT CTA CTC TAA TGG ACT GT CAA CCA ATC CAC GGC AAG A CTA
NW_006916702.1 Ma genomic sequence      ATA CAG AGG TCA AAG GA CCG CTA TTC CAG CAC CCT GT CCA CAA ACT CGA AAG A G A C TCA

Pc_2566 genomic sequence      TAC AIT GTT CTT GCA CA CGA TGT TCA TGA GCA AAC CG TGT ATG AAC TGA CTC CA TAC ATG
NW_006916702.1 Ma genomic sequence      TAC AIT GTG CTG GCT CA TGA TGT TCA CGA ACA AAC CG TAC ACA ATC TGA CAG AG TAC ATG

Pc_2566 genomic sequence      GTA AAG GTT GCT AGA GAG AGG CTA CCA GCT TGT CAC GGT TAG GTG AAT GCC TA GAG GAC
NW_006916702.1 Ma genomic sequence      ATC AGT CIT GCG AGA GA AAG AGG CTA CAA GCT CGT CA CGG TGG GCG AAT GCC TA GGG GAC

Pc_2566 genomic sequence      CCCAGA GGT AACTGG TA TAG ATC ACG GGA AGA CTC GCC CAA AAT CCA CCA GAA GCG A CAAA
NW_006916702.1 Ma genomic sequence      CCCGAG GAG AAC TGG TA CCG TTC GGC AGA GAC CTC TT CGA ACG TGG CCA GGA CC GTT GGC

Pc_2566 genomic sequence      AAG AAA GACT CA TGT CC CGG TCC AAA AAA GCC AAT CG TCA CCG ATA TCC CGC CC CAA AGG
NW_006916702.1 Ma genomic sequence      AAG AAG AAC CTG TG CT C GGG ACC GGC CAA ACC GCA GG TCA CAT CTG TCT CAC CT CCG CGG

Pc_2566 genomic sequence      AAT ACG ACG ACG AAG AT ATC TCC CAA CCA ACG CTG CCG GAG GAA GTA CAG GAT AC ATC TGT
NW_006916702.1 Ma genomic sequence      AAT ACG ACT ACC AAA AT ATC GCC CAA CCA ACG CTG CCG GTG GGA GCA CAG GAT AT ATC TGT

Pc_2566 genomic sequence      CCA GGC TCC GGG TTT GG AGA CTG CTG CTC TCA CTA TG GAT ATT GGT AAT TCT GT CTT TCA
NW_006916702.1 Ma genomic sequence      CCG GGG TCC GGG TTT GG GGA CTG CTG CTC CCA CTG GGG AAT ATT GGT ATG ACC CTTT CAA

Pc_2566 genomic sequence      AAG CCC ACA ACA ACC CACTC ATC ATG AGA AGA GCC TC TTT TTC ACT GAC CGT GT C TCACT
NW_006916702.1 Ma genomic sequence      GCGT ----- AGT CGT TG CCC GCG GGT TCG TTT GC CTT TTC GCT GAC CTT GTC CT ACC

Pc_2566 genomic sequence      AGT GGA TCA ACT CCC GAT T CTG TGG CAC ACG GTG TG ACA ATG ACT TTG GGG ACT GCA AC
NW_006916702.1 Ma genomic sequence      AGC GGA TCA ACG CCC GAG TT TTG TGG CAC GGG GTG CG ACA ATG ACT TTG GGG ACT GCG GAT

Pc_2566 genomic sequence      CCA AAT CCC CCA GGC AT CTG GGA CAC AAC GAA TGG CT TAT GTG GCG CTC GGT TC TCT CCG
NW_006916702.1 Ma genomic sequence      CCA TCC CCG CAG GGT GT TTT GGA TAC AAC GAA TGG CCT GTG GTG GCA CTC GGT ACT CT GCT

Pc_2566 genomic sequence      ACA TGC CTT AAT TTT GC AAG AAA GGC ATG CTG CTC CAA GT ATG GAT ATT GGT AT GTA GTG
NW_006916702.1 Ma genomic sequence      ACC TGT CIT CACT TT GC GGG AAG GAC GTG CTG CTC AA AGT ATG GAT ATT GGT AT GTG C--

Pc_2566 genomic sequence      CAT TCT GTG TGG TTA CT TTA TCG GTT GGA CTG ACG TG GTC GGC AGC GGC AAT AAG ACT GA
NW_006916702.1 Ma genomic sequence      CGT TTC TCG TCG CCA AG TTT ATT GGT GTT CTG ACA AT TCA AGT AGC GGG AGT CA GGT TGA

Pc_2566 genomic sequence      GCA TTG TGG TGA AGG TT GCC AAG CAA AGT ACG GCC GAT GCG GAT TAG ACA GAT GGT GCG CG
NW_006916702.1 Ma genomic sequence      GCA TTG TGG TGA GGG GT GCC AAG ACA AGT ACG GTC AT TGT GACT GA ATGA-----

Pc_2566 genomic sequence      ATC GTT ACA GAG CTG AG ATG TGA CGA
NW_006916702.1 Ma genomic sequence      -----

```

**Figure S4.** pET22b-*Pc\_2566\_CE*-StrepIIC plasmid for *PcCDA* protein expression. The plasmid contains the *PcCDA* CE4 domain and the Strep tag peptide coding sequences followed by a stop codon before the His tag codifying peptide of the original pET22b(+) vector.

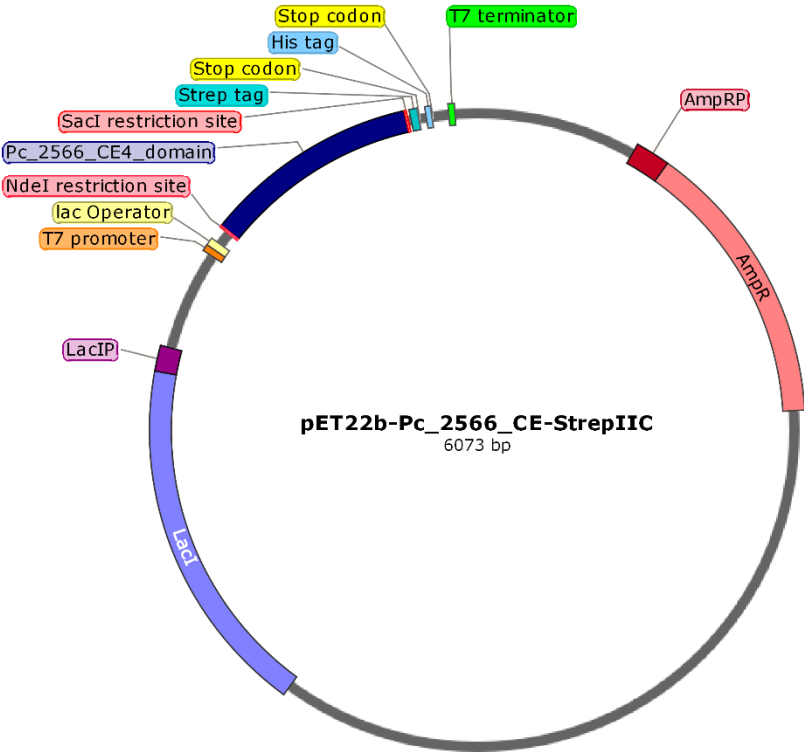

**Figure S5.** SDS polyacrylamide gel electrophoresis analyses of protein expression and refolding. A) Proteins from induced *E. coli* BL21 strain transformed with pET22b-Pc\_2566\_CE4. Lane S: supernatant (soluble fraction), Lane P: insoluble fraction (pellet) after cell disruption. B) Protein refolding and purification. Lane 1, culture supernatant (soluble fraction). Lanes 2 and 3, pellet after Triton X100 treatment. Lanes 4 and 5, samples after two washes to remove Triton X100. Lane 6, supernatant after urea treatment for protein solubilisation. Lane 7, pellet obtained after urea treatment. Lane 8, sample after protein refolding by dialysis. Arrowheads indicate expected size of PcCDA catalytic domain. Original gels in Fig. S11.

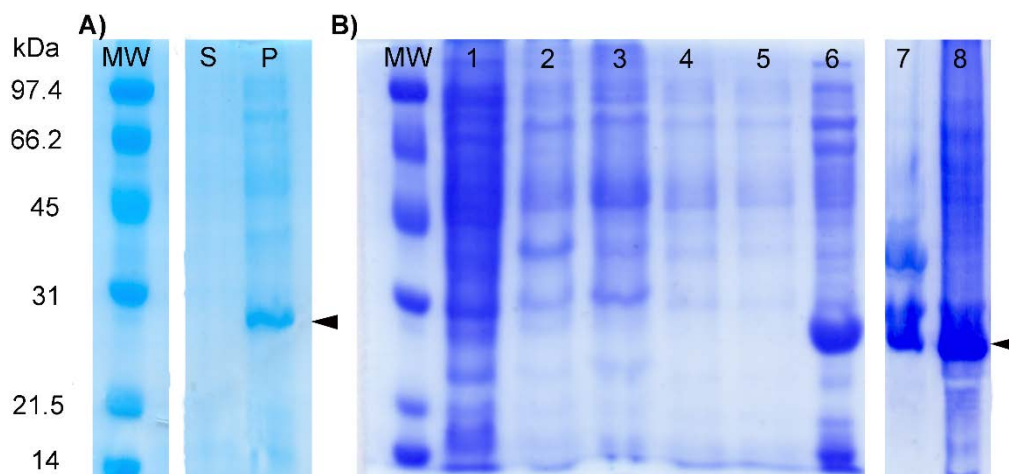

**Figure S6.** HPLC-MS monitoring of deacetylase activity by *PcCDA* catalytic domain on GlcNAc<sub>4</sub>. Chromatograms show the presence of the starting product (A4) and the formation of mono-deacetylated (A3D1) and di-deacetylated (A2D2) products at different reaction times: (A) 1 h, (B) 16 h, (C) 24 h and (D) 100 h. Reaction conditions: 0.2 mM substrate, 3.2 nM enzyme, 50 mM K<sub>2</sub>HPO<sub>4</sub>, 300 mM NaCl, pH 8.0, 37°C.

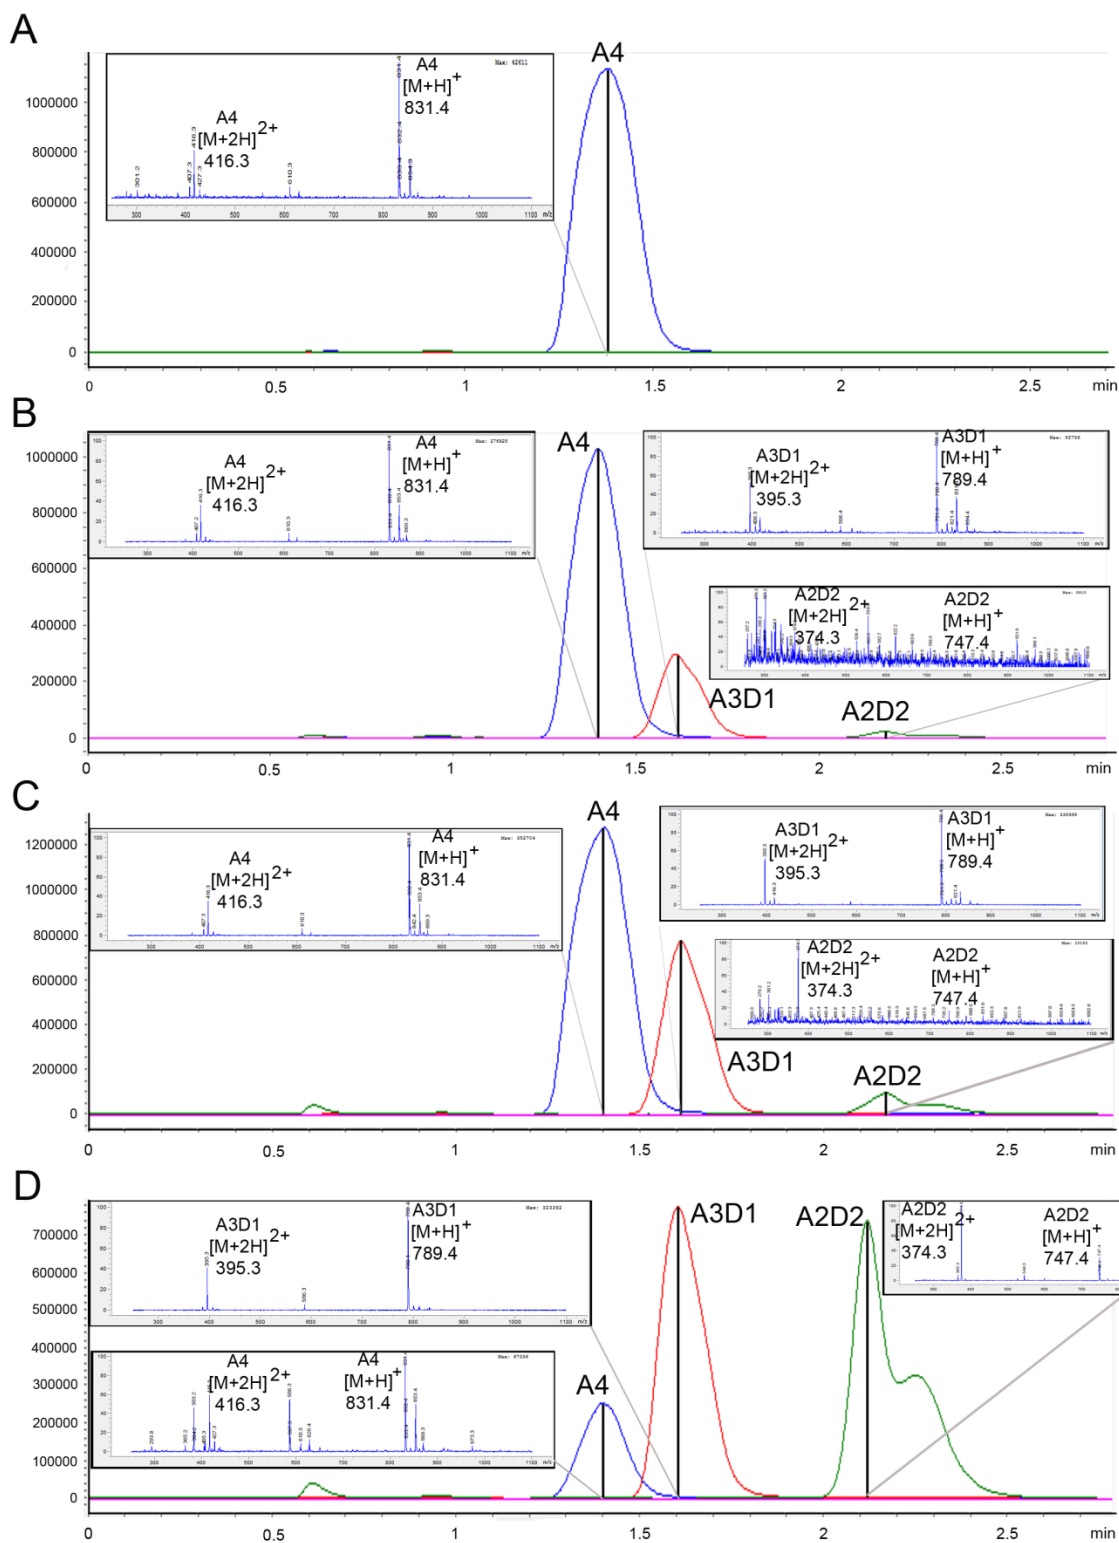

**Figure S7.** HPLC-MS monitoring of  $\text{GlcNAc}_3$  incubated with the *PcCDA* catalytic domain. Chromatograms show the presence of the starting product (A3) and the absence of reaction products with time: (A) 10 min, (B) 5 h, (C) 24 h and (D) 100 h. Reaction conditions: 0.2 mM substrate, 3.2 nM enzyme, 50 mM  $\text{K}_2\text{HPO}_4$ , 300 mM NaCl, pH 8.0, 37°C.

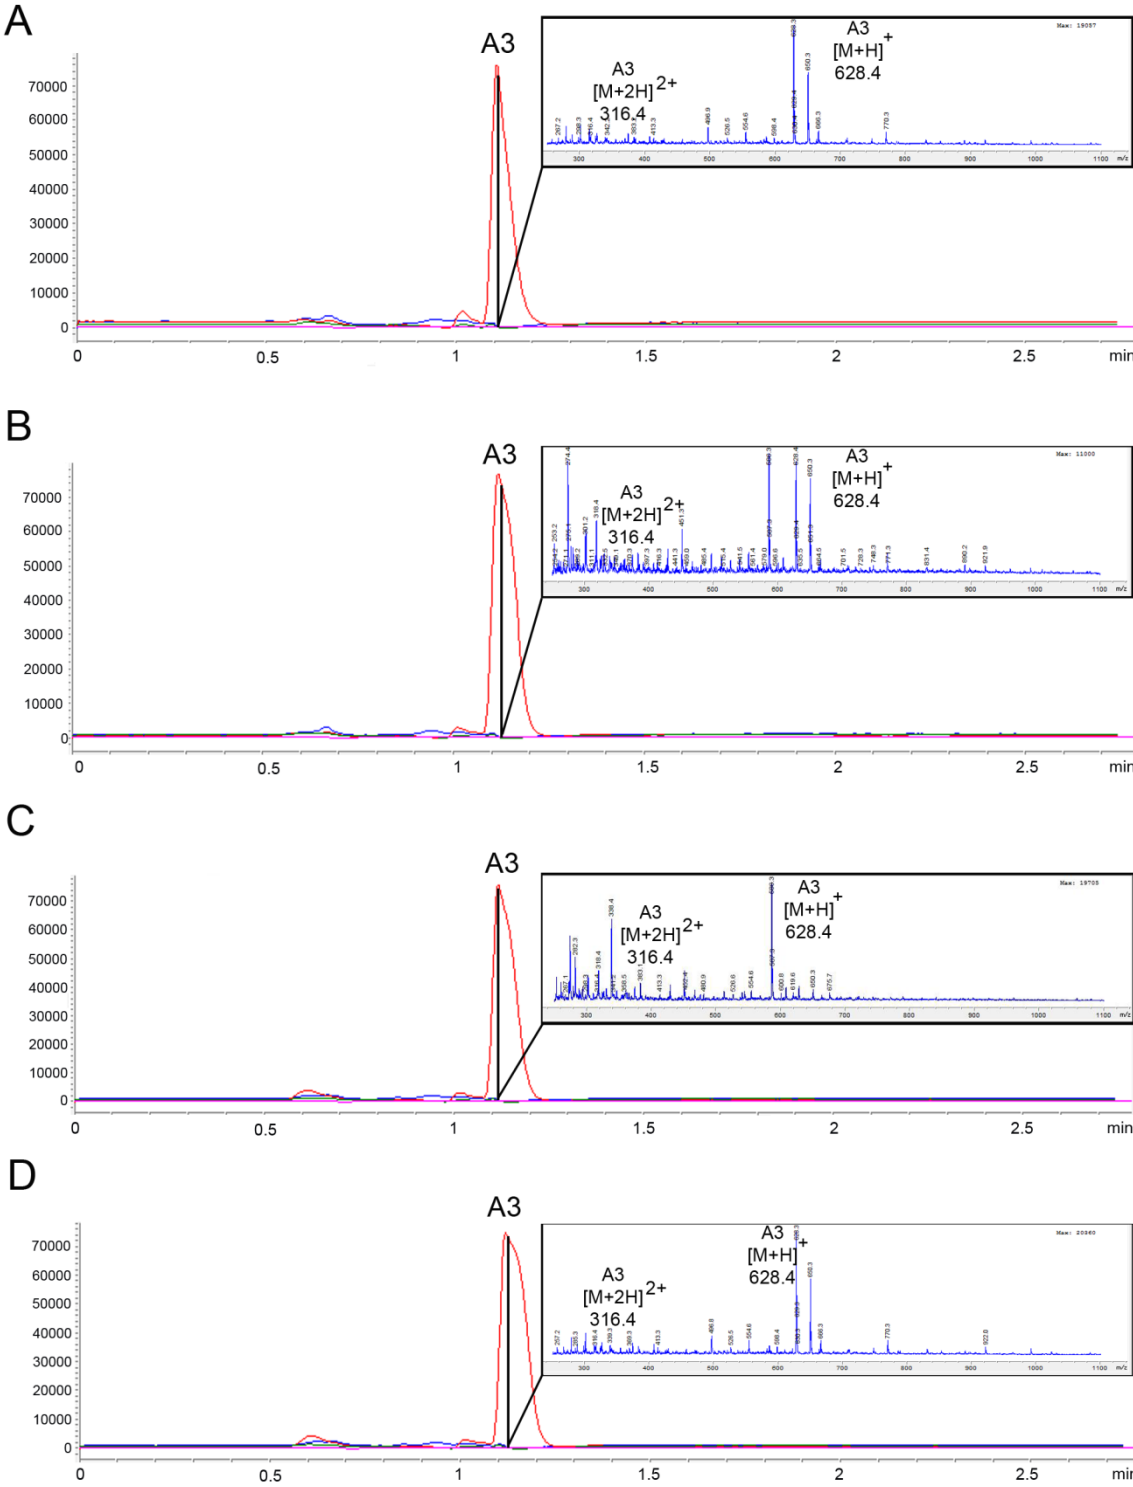



**Figure S8.** Sequence alignment of PcCDA from *P. chlamydosporia* (catalytic domain) and CcCDA from *C. lindemuthianum*.

```

Pc_2566 CDA      MALRISLLFAVCALATDGSRFIRAAEANEEMSMCGPGKGSCEMGSOCSEMGYCGTTEQVCS
CcCDA            -----

Pc_2566 CDA      GSQCQLDYSH--TCHTLVPPRGKDTSGITRRQVGNVITYGPMITACKQPGMVALTFDDGF
CcCDA            ----MHFSTLFGAAATAALAGSTNAEPLARRQ---YFVETPILQCTQPGLVALTYDDGF

Pc_2566 CDA      YIYTEILNLDRLKVKATFFITEDNRVKGHDDPATRWESIIRREMYDAGHQIGSHTWTF
CcCDA            FTFTPQLLDIKQNDVRAEFVNGNNW--ANLEAGSN--DTIRMRADGHLVGSHTYAH
                               Loop 1

Pc_2566 CDA      RDLNHINETVRAEIIHNEMAIINLIGWIFTIIRPPELECSARSCEKTMRDMVYHSIST
CcCDA            PDLNLTSSADNISQMRQLEAETRIIDGFAPKYMRAFYLSGDA--ECQGLGGLGYHIDT
                               Loop 2                               Loop 3

Pc_2566 CDA      NLDTKDYMYDDIILIQRAKDLYSNGLSINPRQNSYIVLARDVHEQTVYELTPYMVKVARE
CcCDA            NLDTKDYENNKIETTHLSAEKFNWELSDVGANSYIVLSHDVHEQTVVSLTQKLIDTLKS
                               Loop 4                               Loop 5                               Loop 6

Pc_2566 CDA      RYQLVIVGECLEDPGRNWRSAEDSPKSTRSDKKKDCSPGPKKPIVTDIIPPRNTTSKI
CcCDA            KGRVAVIVGECLEDPENWYKAHHHHHH-----

Pc_2566 CDA      SPNQRCCGGSTGYICPGSGFGDCCSHYGYCGSTPEFCGTGCDNDFGDCNPNPPGIWDTTNG
CcCDA            -----

Pc_2566 CDA      LCGARFSATCLNFAGKACCSKYGYWYVVHVVWLLYRLD
CcCDA            -----

```

**Figure S9.** Structural models of *PcCDA* catalytic domain in complex with substrates. A) Model 2 with superimposed A3 ligand from template 4OUI (*VcCDA*-A3 complex). B) Simulated docking of A4 ligand to Model 1. In both, A and B, the ligand binding mode places the penultimate GlcNAc residue properly oriented for catalysis in subsite 0. C) Simulated docking of A4 ligand to Model 1 in a second binding mode, which places the reducing end GlcNAc residue in subsite -2. This binding mode was only possible in Model 1 with an extended Loop 1 conformation, but not in Model 2 with a closed Loop 1 conformation. Loops are coloured as in Figures 4 and 6.

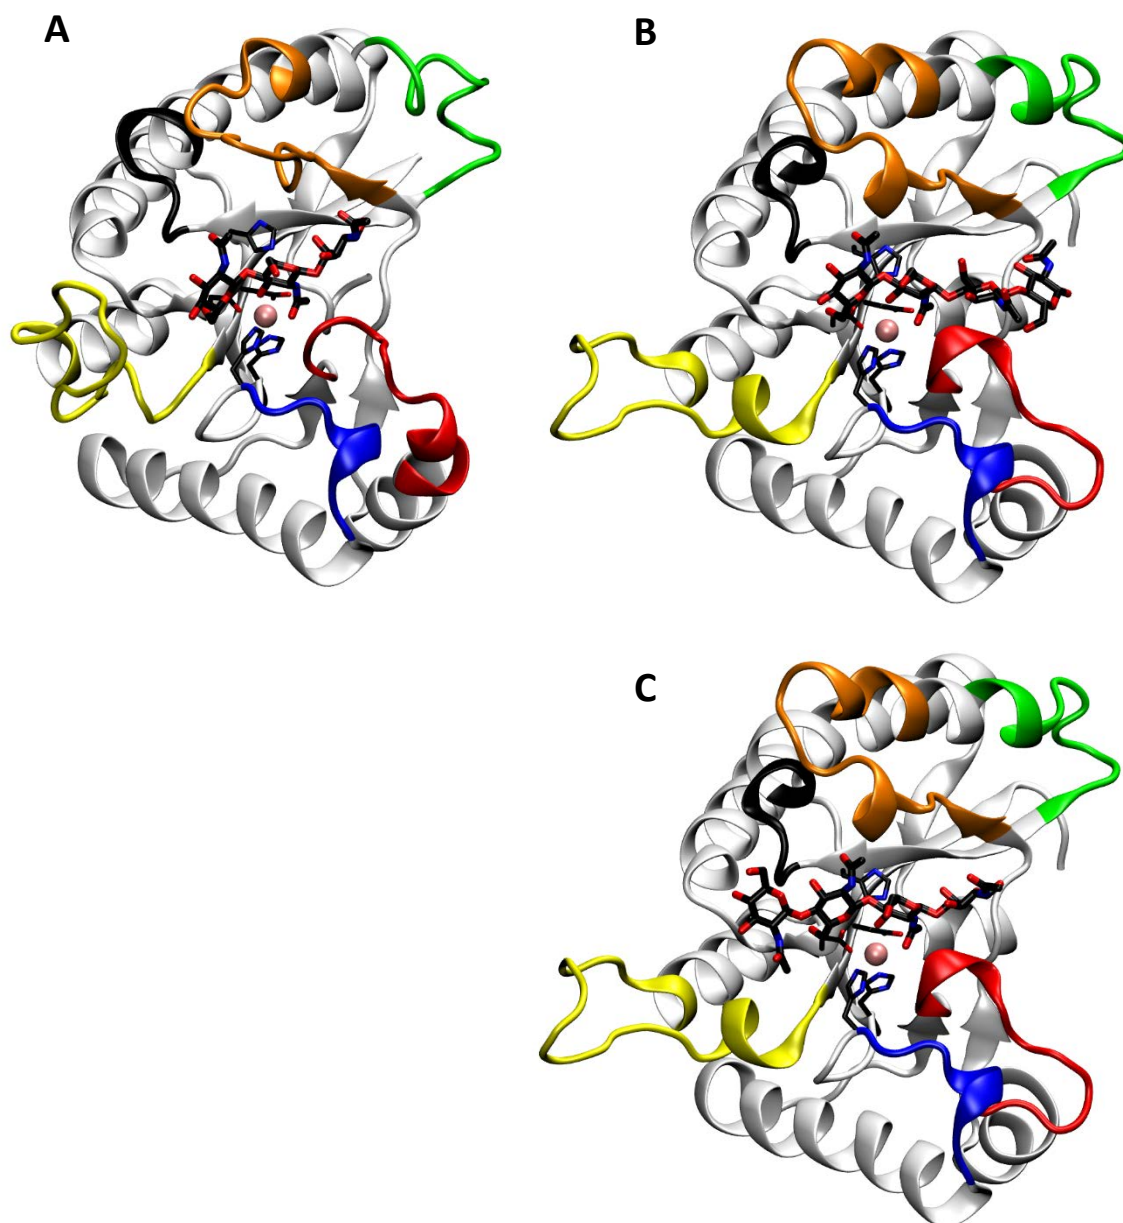

**Figure S10.** Superposition of Models 1 and 2 (model structures A and B in Figure S9). Both models are essentially identical along the protein structure, except for Loop 1, which appears as an ensemble of conformations in both models. Shown here in yellow, the extended (Model 1) and closed (model 2) Loop 1 conformations for the lowest energy models.

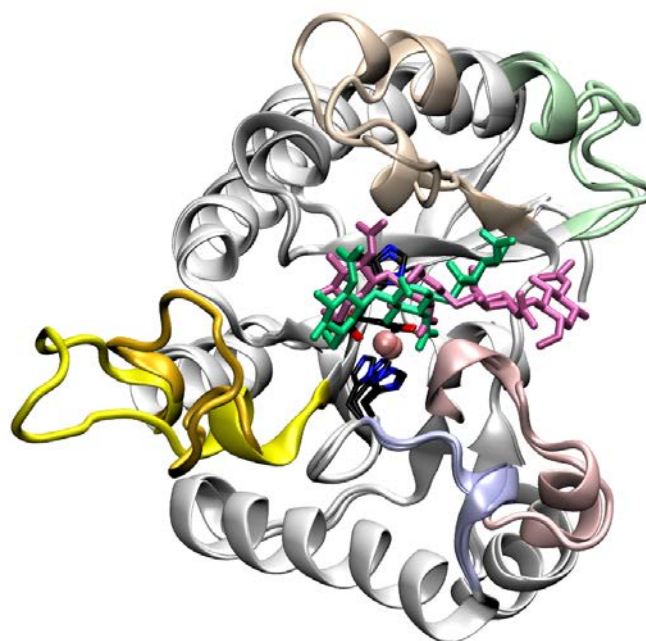

**Figure S11.** Original SDS-PAGE gels used in Figure S5.

A) Original gel in Figure S5.A (labelled lanes)

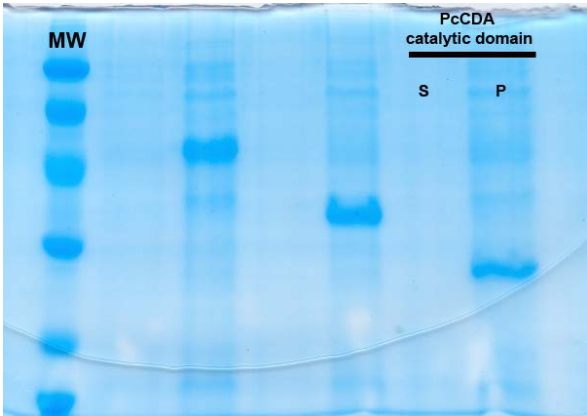

B) Original gels in Figure S5.B (labelled lanes)

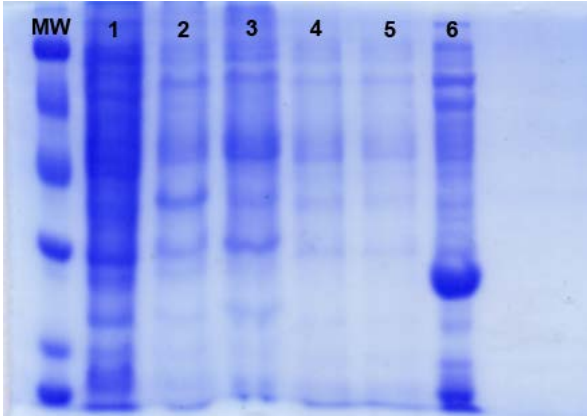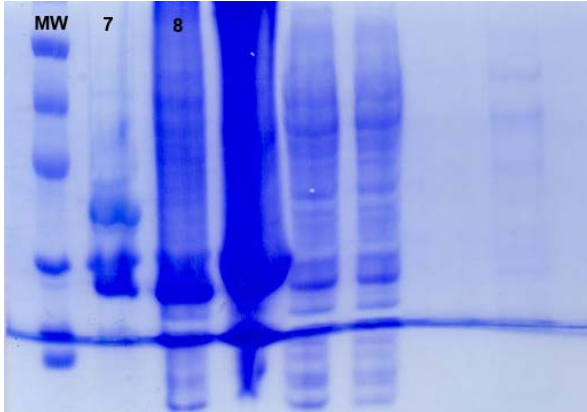

Supplement: 41598_2018_19902_MOESM1_ESM.pdf [file 41598_2018_19902_MOESM1_ESM.pdf]
